# Supplementary material for: Genome-wide association analysis of seedling traits in diverse Sorghum germplasm under thermal stress
Source: BMC Plant Biol. 2017 Jan 13;17:12. doi: 10.1186/s12870-016-0966-2 (PMC5237230; doi:10.1186/s12870-016-0966-2)
Supplement: Additional file 5: — List of related RNASeq normalized FPKM values for susceptible (BTx623) and tolerant (Hong Ke Zi) lines during cold stress retrieved from Chopra et al. [20]. (XLSX 10 kb) [file 12870_2016_966_MOESM5_ESM.xlsx]

## Sheet: Sheet1
Gene stable ID	BTx623_12C_7	BTx623_28C_7	HKZ_12C_7	HKZ_28C_7
Sb01g009310	1.88	1.84	2.48	2.07
Sb06g024950	1.2	1.32	0.68	1.27
Sb06g025060	1.09	0.32	2.19	0.94
Sb06g024960	1.83	0.69	0.46	0.77
Sb06g025040	3	2.82	7.81	2.91
Sb06g024820	12.2	10.51	13.26	10.44
Sb06g024740	5.27	2.61	5.52	3.49
Sb06g015560	2.68	4.85	5.01	2.98
Sb02g042450	0.98	0.31	1.08	0.69
Sb02g039680	1.44	2.41	0.62	2.62
Sb09g006020	1.3	0.86	1.21	0.92
Sb02g023140	0.51	0.19	0.43	0
Sb02g022130	0.44	1.04	0.39	0.16
Sb04g030940	23.44	31.18	17.65	23
Sb03g013220	6.49	4.43	4.66	3.42
Sb02g023120	1.13	1.08	1.28	1.05
Sb02g038300	2.04	1.23	1.24	1.65
Sb02g038630	4.05	2.45	5.17	2.35
Sb02g022140	3.75	4.81	6.09	4.87
Sb05g001220	0	0.04	0	0
Sb06g028380	8.88	11.41	10.63	10.42
Sb06g028370	15.32	4.85	7.57	4.66
Sb06g028540	1.81	2.72	1.73	2
Sb03g023720	9.8	8.93	7.63	6.69
Sb06g002880	15.31	9.75	9.78	6.87
Sb03g031320	6.89	5.64	9.77	4.96
Sb02g038910	0.16	0.1	0.13	0.33
Sb06g017060	1.79	1.82	1.77	0.85
Sb06g016880	0.19	0.13	0.15	0.09
Sb06g017025	9.07	8.7	12.14	9.96
Sb03g001820	0.05	0.12	0	0
Showed differences in expression based on FPKM values
